# Supplementary material for: A p-nitroaniline redox-active solid-state electrolyte for battery-like electrochemical capacitive energy storage combined with an asymmetric supercapacitor based on metal oxide functionalized β-polytype porous silicon carbide electrodes
Source: Royal Society of Chemistry journal article supplement (doi:10.1039/c7dt00056a), 2017-01-01
Supplement: c7dt00056a1.pdf [file c7dt00056a1.pdf]

Supporting online Materials for

***p*-nitroaniline redox-active solid-state electrolyte for battery-like electrochemical capacitive energy storage combined with asymmetric supercapacitor based on metal oxides functionalized  $\beta$ -polytype porous silicon carbide electrodes**

*Myeongjin Kim<sup>a</sup>, Jeeyoung Yoo<sup>b</sup> and Jooheon Kim<sup>a,\*</sup>*

<sup>a</sup> School of Chemical Engineering & Materials Science, Chung-Ang University, 211 Heukseok-dong, Dongjak-gu, Seoul 156-756, Republic of Korea

<sup>b</sup> Program in Nano Science and Technology, Graduate School of Convergence Science and Technology, Seoul National University, 1 Gwanak-ro, Gwanak-gu, Seoul, Republic of Korea

E-mail: jyoo78@snu.ac.kr

\*Corresponding author: Jooheon Kim, [Tel:+82-2-820-5763](tel:+82-2-820-5763); Fax:+82-2-812-3495; E-mail address:

[jooheonkim@cau.ac.kr](mailto:jooheonkim@cau.ac.kr) (J. Kim)

## 1. Calculations and equations

The ionic conductivity of electrolyte can be calculated by the following equation:

$$\sigma = \frac{l}{R_b \times A} \quad \text{S(1)}$$

Where  $\sigma$  is the ionic conductivity ( $\text{S cm}^{-1}$ ),  $l$  is the distance between the two stainless steel sheets (cm),  $A$  is the contact area of the electrolyte film with stainless sheets during the experiment ( $\text{cm}^2$ ),  $R_b$  is the bulk resistance ( $\Omega$ ).

The specific capacitances ( $C_s$ ) are calculated from the CV and galvanostatic charge/discharge curves using the following equation:

$$C_s = \frac{1}{\nu(V_c - V_a)} \int_{V_a}^{V_c} I(V) dV \quad \text{S(2)}$$

$$C_s = \frac{I \times t}{m \times \Delta V} \quad \text{S(3)}$$

where  $C_s$  is the specific capacitance ( $\text{F g}^{-1}$ ),  $\nu$  is the potential scan rate ( $\text{mV s}^{-1}$ ),  $V_c - V_a$  represents the sweep potential range (V),  $I(V)$  denotes the response current density ( $\text{A g}^{-1}$ ),  $I$  is the discharge current,  $t$  is the discharge time,  $m$  is the mass of active material, and  $\Delta V$  is the voltage drop upon discharging.

The frequency response capacitances were estimated using a series-RC circuit model:

$$C(f) = \frac{-1}{2\pi f M \times Z''(f)} \quad \text{S(4)}$$

where  $C$  is the capacitance ( $\text{F/g}$ ),  $f$  is the frequency,  $M$  is total mass of active materials in both electrodes (g), and  $Z''(f)$  is the imaginary part of the impedance.

The frequency-dependent imaginary ( $C''(f)$ ) component of the capacitance were obtained from the impedance spectra according to the following equation:

$$C''(f) = \frac{Z'(f)}{2\pi f M \times |Z(f)|^2} \quad \text{S(5)}$$

where  $C''(f)$  is the imaginary capacitance,  $f$  is the frequency,  $M$  is total mass of active materials in

both electrodes (g),  $Z'(f)$  is the real part of the impedance, respectively, and  $|Z(f)|$  is the absolute value of the impedance.

The time constant ( $\tau_0$ ), which is a characteristic parameter indicating the rate capability of an electrical system, can be estimated from the peak frequency of  $C''(f)$  using the following equation:

$$\tau_0 = \frac{1}{f} \quad \text{S(6)}$$

where  $f$  is the frequency corresponding to the peak frequency of the imaginary capacitance.

The power density and energy density of symmetrical supercapacitor systems were calculated using the following equations:

$$E = \frac{1}{2} C(\Delta V)^2 \quad \text{S(7)}$$

$$P = \frac{E}{t} \quad \text{S(8)}$$

where  $P$ ,  $C$ ,  $\Delta V$ ,  $t$ , and  $E$  represent the power density ( $\text{W kg}^{-1}$ ), specific capacitance based on the mass of the electroactive material ( $\text{F g}^{-1}$ ), cell voltage for charging and discharging (V), discharge time (s), and energy density ( $\text{W h kg}^{-1}$ ), respectively.

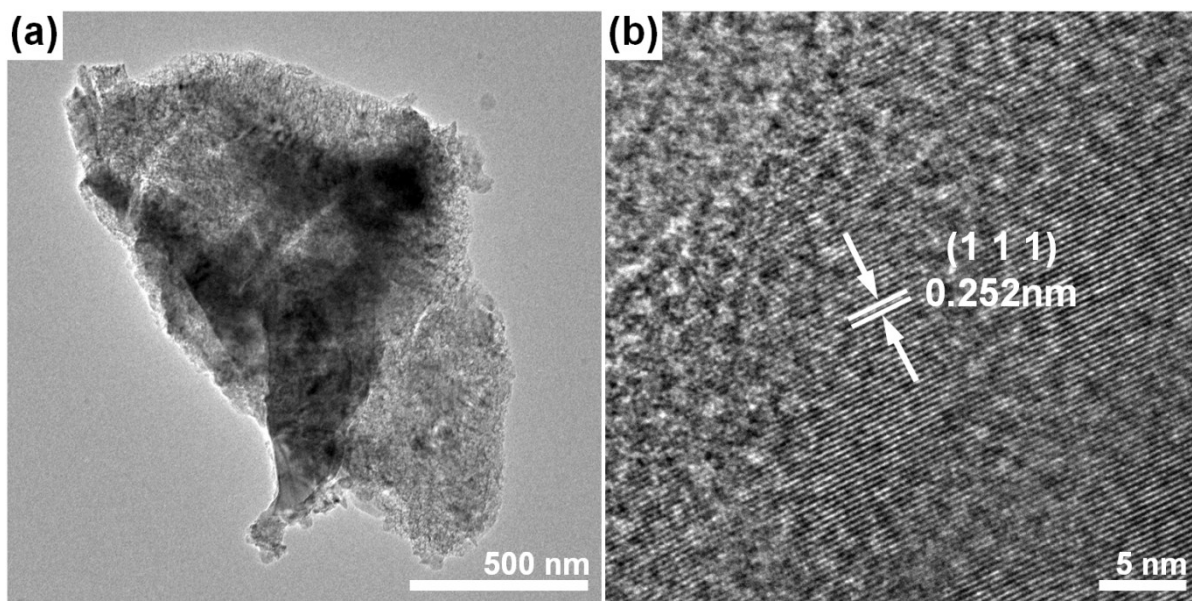

**Figure S1.** (a) Low-magnification FE-TEM image of SiCF. (b). High-magnification FE-TEM image of SiCF.

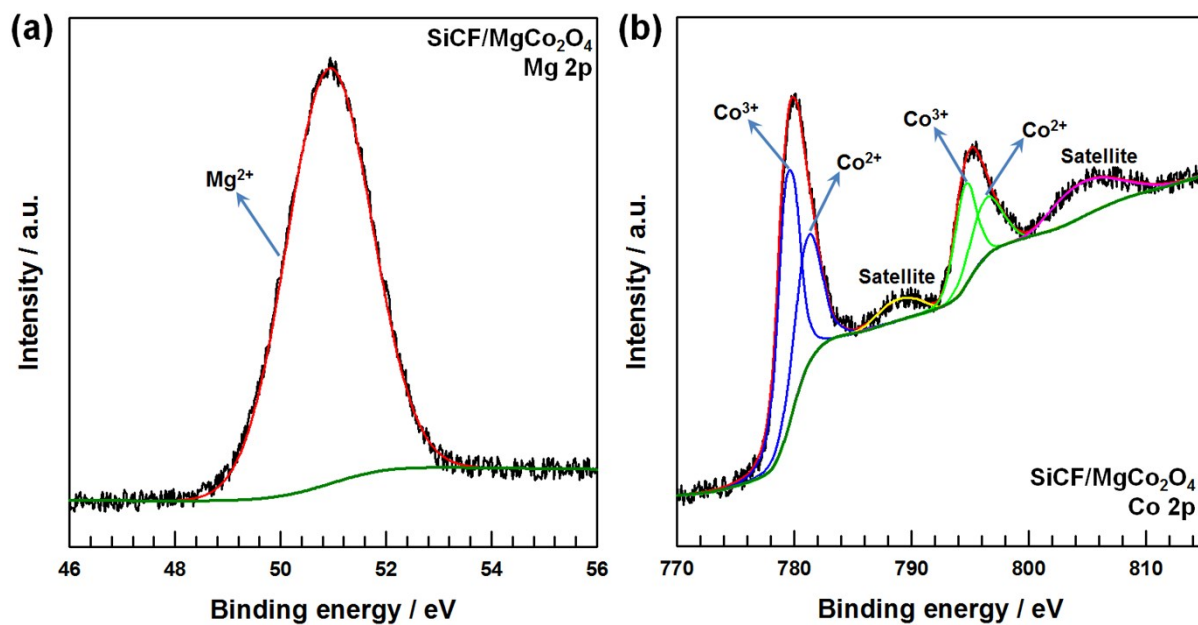

**Figure S2.** (a) Deconvoluted XPS Mg 2p spectra of SiCF/MgCo<sub>2</sub>O<sub>4</sub>. (b) Deconvoluted XPS Co 2p spectra of SiCF/MgCo<sub>2</sub>O<sub>4</sub>.

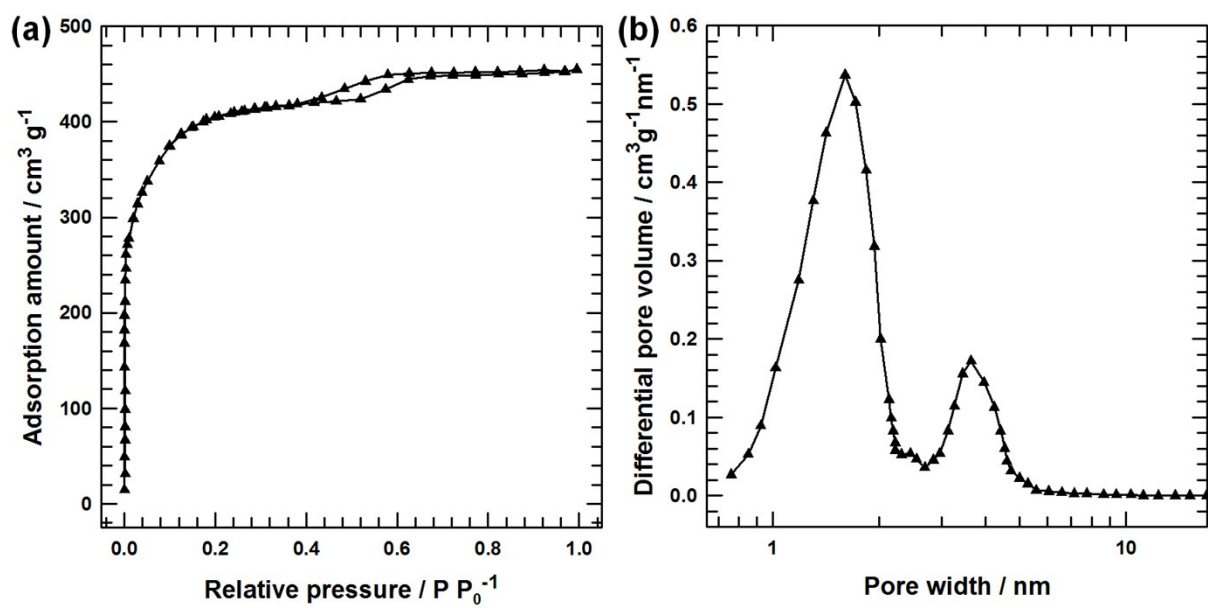

**Figure S3.** (a) Nitrogen adsorption-desorption isotherm of SiCF. (b) Pore size distribution of SiCF.

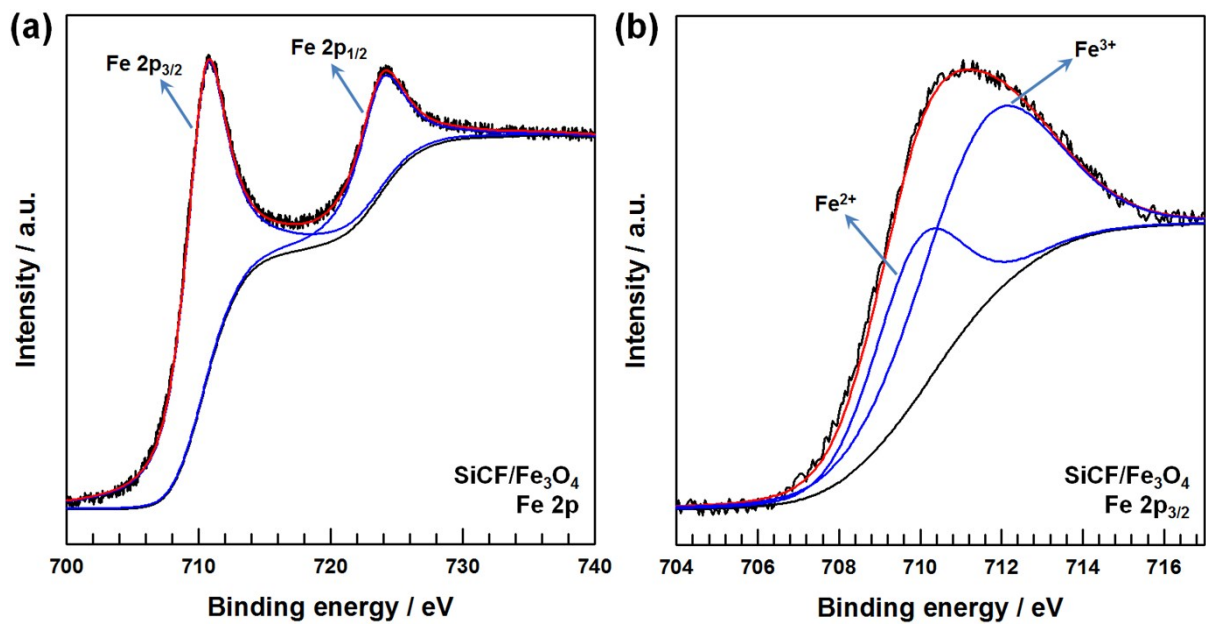

**Figure S4.** (a) Deconvoluted XPS Fe 2p spectra of SiCF/Fe<sub>3</sub>O<sub>4</sub>. (b) Deconvoluted XPS Fe 2p<sub>3/2</sub> spectra of SiCF/Fe<sub>3</sub>O<sub>4</sub>.

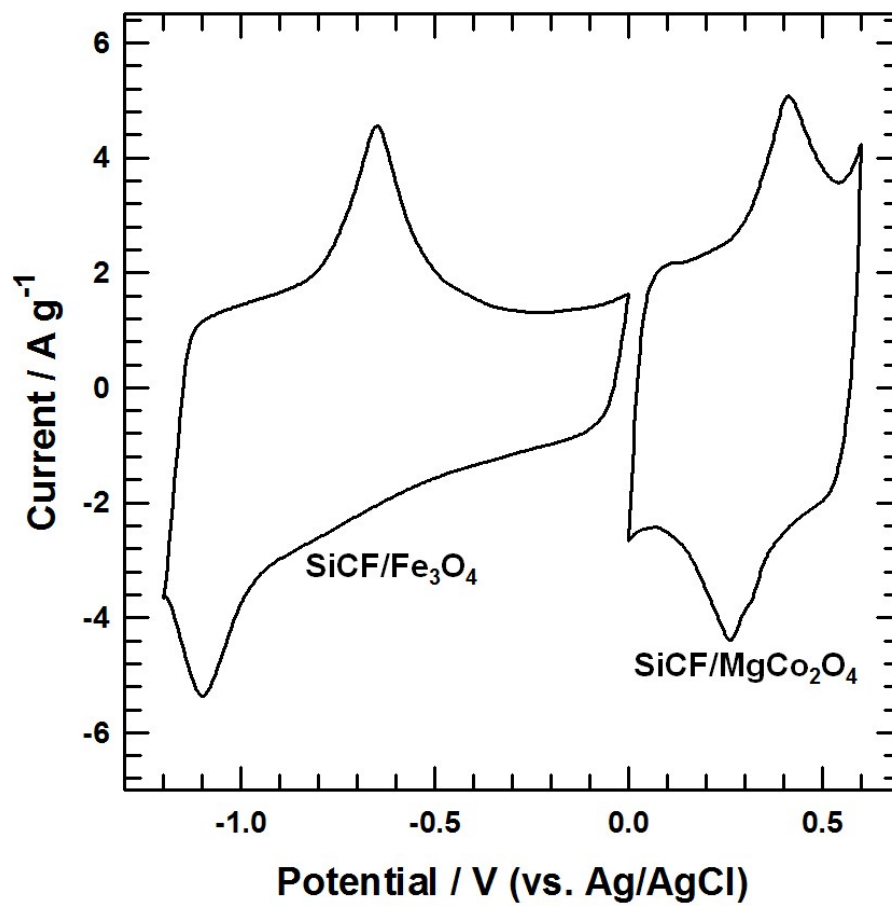

**Figure S5.** Comparative CV curves of SiCF/Fe<sub>3</sub>O<sub>4</sub> and SiCF/MgCo<sub>2</sub>O<sub>4</sub> electrodes performed in a three electrode cell at a scan rate of 5 mV s<sup>-1</sup>.



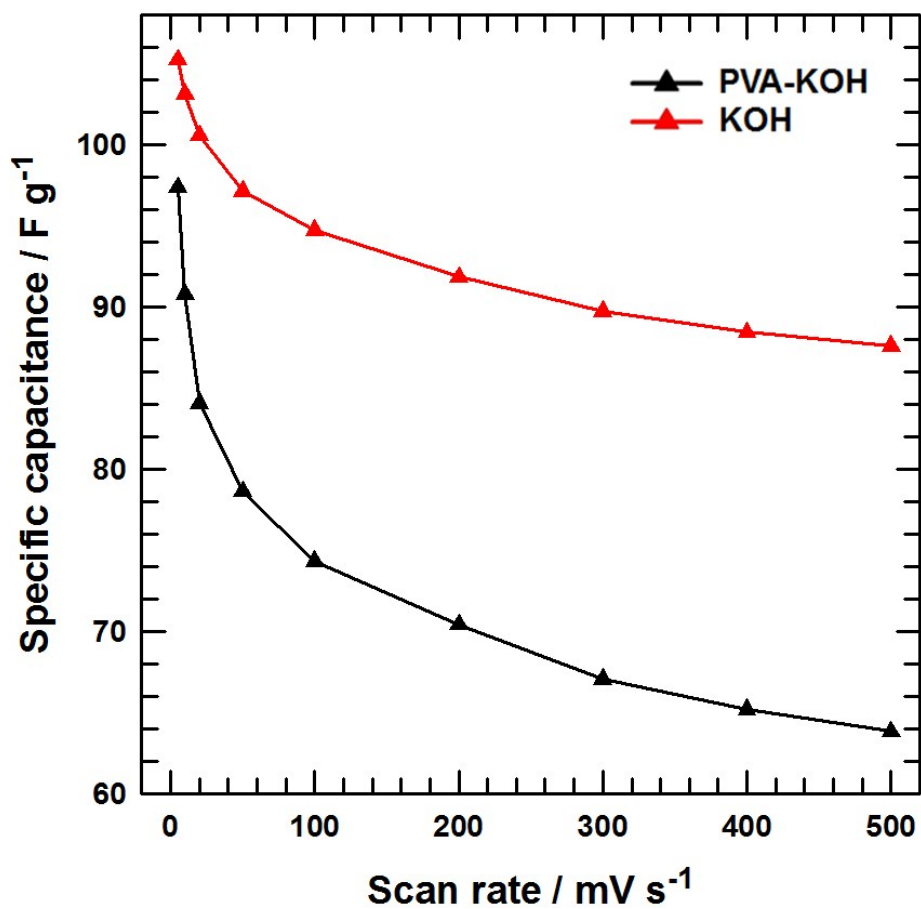

**Figure S6.** Specific capacitances for SiCF/MgCo<sub>2</sub>O<sub>4</sub>/SiCF/Fe<sub>3</sub>O<sub>4</sub> cell with KOH aqueous and PVA-KOH gel electrolyte at different scan rates.

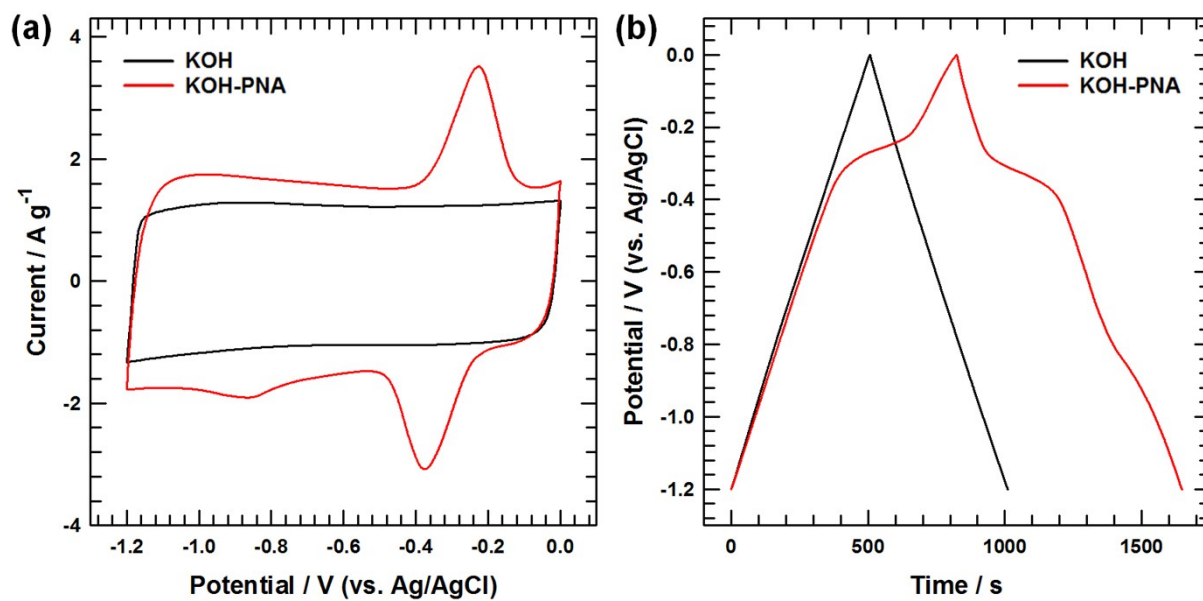

**Figure S7.** (a) CV curves of KOH and KOH-PNA aqueous electrolyte with SiCF electrode performed in a three electrode cell at a scan rate of  $5 \text{ mV s}^{-1}$ . (b) Gavanostatic charge/discharge curves of KOH and KOH-PNA aqueous electrolyte with SiCF electrode performed in a three electrode cell at a current density of  $0.5 \text{ A g}^{-1}$ .

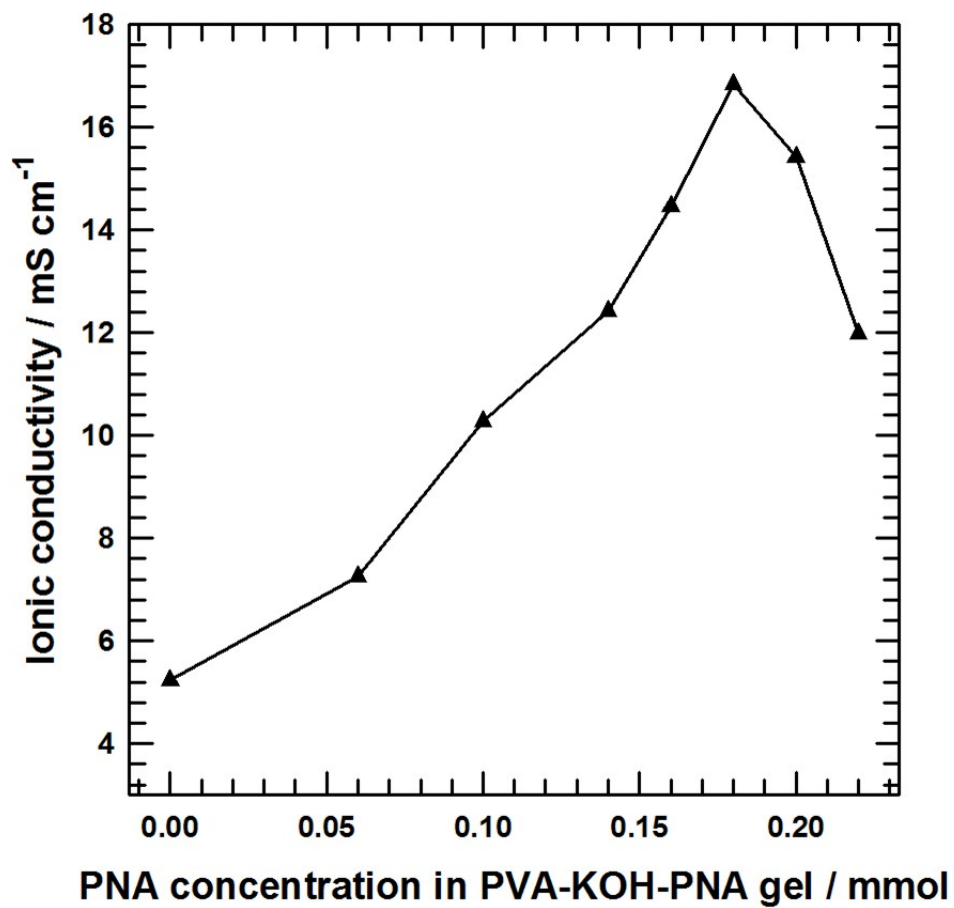

**Figure S8.** Ionic conductivity of PVA-KOH-PNA gel electrolyte containing different amounts of PNA (PVA = 1 g, KOH = 1 g).
